# Supplementary material for: Estimating distributed soil texture using time series of thermal remote sensing – A case study in central Europe
Source: Copernicus journal article supplement (doi:10.5194/hess-2016-115), 2016-04-04
Supplement: Supplementary file [file hess-2016-115-RC2-supplement.pdf]

Review result for Journal: Hydrol. Earth Syst. Sci. Discuss.

Manuscript Number HESS-2016-115

Title: Estimating distributed soil texture using time series of thermal remote sensing – A case study in central Europe

The paper addresses an important topic and indicates valuable research results due to the estimation of soil texture data using thermal satellite remote sensing data. The manuscript presents relevant research information and is easy to read and to understand. I believe that with minor revisions the manuscript has potential to be a real scientific contribution and cover a timely issue for a broad readership. I suggest the manuscript for publication in HESS.

Reviewers Suggestions:

- I suggest to insert the expression „spatial or spatially“ (e.g. line 7 and title) to soil texture pattern
- Insert a conclusion sentence at the end of the abstract that gives information about the use of the research results or outlook for future developments in remote sensing and hydrology community.
- I recommend short explaining sentences on the used remote sensing TOA signal data as it is applied as physical source of information about soil texture.
- English and grammar: I provide not the proper competence to review language errors.
